# Supplementary material for: Iron Deficiency among School-Aged Adolescents in Hong Kong: Prevalence, Predictors, and Effects on Health-Related Quality of Life
Source: MDPI journal article supplement (doi:10.3390/ijerph20032578), 2023-01-31
Supplement: s1 [file s1]

## Supplementary Materials

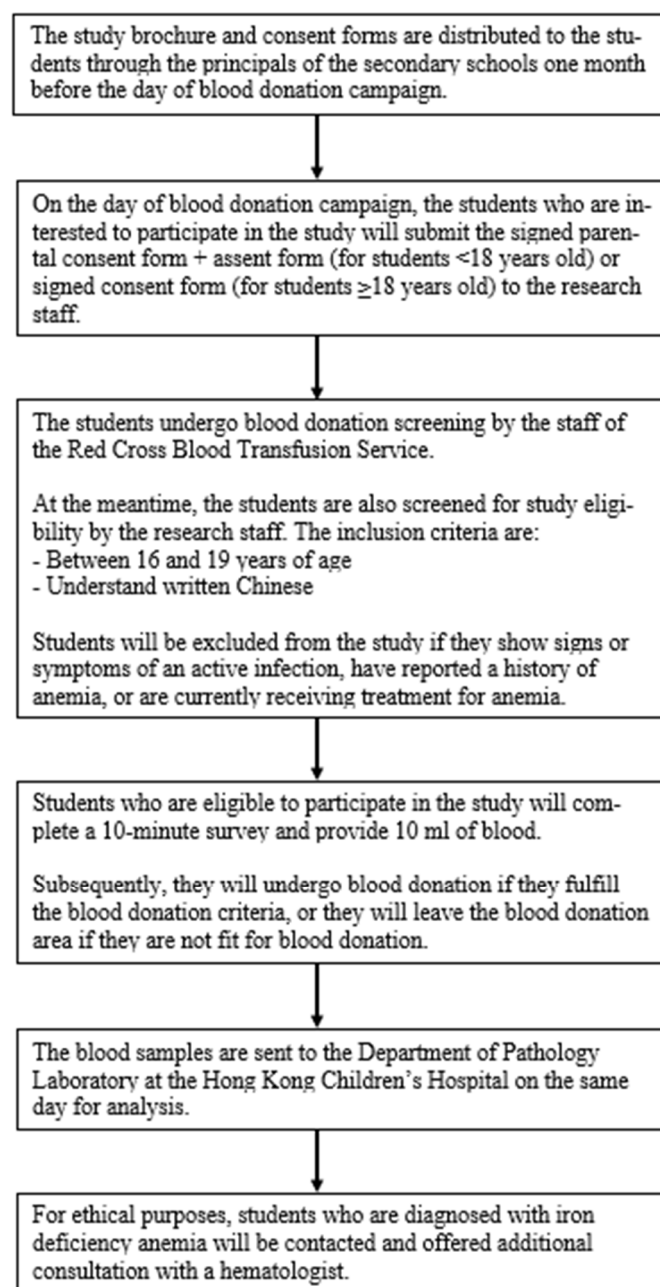

Supplementary Figure S1. Study Schema.

**Supplementary Table S1.** Instrument Specifications.

|                                                                                           |      |      |
|-------------------------------------------------------------------------------------------|------|------|
| <b>Ferritin</b>                                                                           |      |      |
| Analytical platform: Roche cobas 8000, method: Electrochemiluminescence immunoassay (ECL) |      |      |
| Within Batch Precision Biorad Tumor Marker QC lot 23960                                   |      |      |
| Level                                                                                     | Mean | %CV  |
| 1                                                                                         | 21.9 | 1.59 |
| 2                                                                                         | 282  | 1.03 |
| 3                                                                                         | 541  | 1.35 |
| Between Days Precision Biorad Tumor Marker QC lot 94910                                   |      |      |
| Level                                                                                     | Mean | %CV  |
| 1                                                                                         | 24.8 | 2.26 |
| 2                                                                                         | 302  | 2.29 |
| 3                                                                                         | 545  | 2.70 |
| <b>C-reactive protein</b>                                                                 |      |      |
| Analytical platform: Roche cobas 8000, method: Particle-enhanced immunoturbidimetric      |      |      |
| Within Batch Precision Biorad Immunology QC lot 68590                                     |      |      |
| Level                                                                                     | Mean | %CV  |
| 1                                                                                         | 7.67 | 1.1  |
| 2                                                                                         | 24.2 | 1.5  |
| 3                                                                                         | 41.4 | 1.9  |
| Between days Precision Biorad Immunology QC lot 68990                                     |      |      |
| Level                                                                                     | Mean | %CV  |
| 1                                                                                         | 8.11 | 2.41 |
| 2                                                                                         | 28.7 | 2.48 |
| 3                                                                                         | 43.4 | 2.66 |
| <b>Iron</b>                                                                               |      |      |
| Analytical platform: Roche cobas 8000, method: Ferrozine, no deproteninization            |      |      |
| Within Batch Precision Biorad Multiquel Unassayed QC lot 47990                            |      |      |
| Level                                                                                     | Mean | %CV  |
| 1                                                                                         | 12.8 | 1.71 |
| 2                                                                                         | 28.9 | 2.00 |
| 3                                                                                         | 42.2 | 2.00 |
| Between Days Precision Biorad Multiquel Unassayed QC lot 56680                            |      |      |
| Level                                                                                     | Mean | %CV  |
| 1                                                                                         | 13.5 | 1.84 |
| 2                                                                                         | 27.1 | 3.96 |
| 3                                                                                         | 39.7 | 1.29 |
| <b>TIBC = Iron + UIBC</b>                                                                 |      |      |
| UIBC:                                                                                     |      |      |
| Analytical platform: Roche cobas 8000, method: Ferrozine                                  |      |      |
| Within Batch Precision Biorad Multiquel Unassayed QC lot 47990                            |      |      |
| Level                                                                                     | Mean | %CV  |
| 1                                                                                         | 23.9 | 3.70 |
| 2                                                                                         | 21.8 | 4.58 |
| 3                                                                                         | 24.5 | 4.16 |
| Between Days Precision UIBC Biorad Multiquel Unassayed QC lot 56680                       |      |      |
| Level                                                                                     | Mean | %CV  |
| 1                                                                                         | 19.6 | 6.40 |
| 2                                                                                         | 35.4 | 3.18 |
| 3                                                                                         | 36.1 | 3.67 |
| <b>CBC</b>                                                                                |      |      |

Analyzer XN 9100 L (SIN 14124), XN 9100R (SIN 14122) and XN 1500 (SIN 14121)

|                                    | QC levels | Mean   | Greatest SD | Greatest CV | Intra-individual biological variation (CVi) | Estimation of uncertainty of measurement (2 CV) |
|------------------------------------|-----------|--------|-------------|-------------|---------------------------------------------|-------------------------------------------------|
| Hemoglobin (g/dl)                  | L1        | 5.7    | 0.1         | 1.40        | 2.7%                                        | ±2.8%                                           |
|                                    | L2        | 12     | 0.1         | 0.80        |                                             | ±1.6%                                           |
|                                    | L3        | 15.1   | 0.1         | 0.61        |                                             | ±1.22%                                          |
| WBC (×10 <sup>9</sup> /L)          | L1        | 3.02   | 0.80        | 2.77        | 10.8%                                       | ±5.54%                                          |
|                                    | L2        | 6.98   | 0.13        | 1.86        |                                             | ±3.72%                                          |
|                                    | L3        | 16.28  | 0.25        | 1.54        |                                             | ±3.08%                                          |
| Platelet (×10 <sup>9</sup> /L)     | L1        | 83.4   | 3           | 3.69        | 5.6%                                        | ±7.38%                                          |
|                                    | L2        | 263.4  | 8           | 3.12        |                                             | ±6.24%                                          |
|                                    | L3        | 549.2  | 13          | 2.44        |                                             | ±4.88%                                          |
| MCV (fl)                           | L1        | 71.6   | 0.8         | 1.10        | 0.8%                                        | ±2.2%                                           |
|                                    | L2        | 79.3   | 0.9         | 1.10        |                                             | ±2.2%                                           |
|                                    | L3        | 85.9   | 0.8         | 0.90        |                                             | ±1.8%                                           |
| MCH (pg)                           | L1        | 24.3   | 0.3         | 1.30        | 0.8%                                        | ±2.6%                                           |
|                                    | L2        | 27.1   | 0.3         | 0.90        |                                             | ±1.8%                                           |
|                                    | L3        | 29.9   | 0.3         | 0.90        |                                             | ±1.8%                                           |
| MCHC (g/dL)                        | L1        | 33.9   | 0.6         | 1.90        | 1.0%                                        | ±3.8%                                           |
|                                    | L2        | 34.2   | 0.4         | 1.20        |                                             | ±2.4%                                           |
|                                    | L3        | 34.8   | 0.5         | 1.30        |                                             | ±2.6%                                           |
| HCT (L/L)                          | L1        | 0.168  | 0.003       | 1.83        | 2.8%                                        | ±3.66%                                          |
|                                    | L2        | 0.349  | 0.004       | 1.22        |                                             | ±2.44%                                          |
|                                    | L3        | 0.434  | 0.006       | 1.22        |                                             | ±2.44%                                          |
| RDW (%)                            | L1        | 18.5   | 0.3         | 1.50        | 4.3%                                        | ±3.0%                                           |
|                                    | L2        | 17.9   | 0.2         | 1.10        |                                             | ±2.2%                                           |
|                                    | L3        | 16.3   | 0.11        | 0.70        |                                             | ±1.4%                                           |
| Reticulocyte (×10 <sup>9</sup> /L) | L1        | 138.08 | 5.00        | 3.73        | 9.7%                                        | ±7.46%                                          |
|                                    | L2        | 108.8  | 4.74        | 4.49        |                                             | ±8.98%                                          |
|                                    | L3        | 65.362 | 3.54        | 5.60        |                                             | ±11.2%                                          |

Courtesy of the Department of Pathology, Hong Kong Children's Hospital.

**Supplementary Table S2.** Frequency of Intake of Iron-containing Foods.

| Dietary Characteristics                             | Estimated Iron Content # | All (n = 523)<br>n (%) | Male (n = 183)<br>n (%) | Female (n = 340)<br>n (%) |
|-----------------------------------------------------|--------------------------|------------------------|-------------------------|---------------------------|
| <b>Intake of seafood <sup>8</sup></b>               |                          |                        |                         |                           |
| Not at all                                          | 9.2 – 27.9 mg (100mg)    | 47 (9.0)               | 15 (8.2)                | 32 (9.4)                  |
| Once/twice per week                                 |                          | 272 (52.1)             | 89 (48.6)               | 183 (54.0)                |
| Alternate day                                       |                          | 150 (28.7)             | 62 (33.9)               | 88 (26.0)                 |
| Daily                                               |                          | 53 (10.2)              | 17 (9.3)                | 36 (10.6)                 |
| <b>Intake of meat <sup>7</sup></b>                  |                          |                        |                         |                           |
| Not at all                                          | 1.2 – 2.6 mg (100g)      | 1 (0.2)                | 1 (0.6)                 | 0                         |
| Once/twice per week                                 |                          | 26 (5.0)               | 3 (1.6)                 | 23 (6.8)                  |
| Alternate day                                       |                          | 92 (17.6)              | 25 (13.7)               | 67 (19.8)                 |
| Daily                                               |                          | 403 (77.2)             | 154 (84.2)              | 249 (73.4)                |
| <b>Intake of iron-fortified cereal <sup>6</sup></b> |                          |                        |                         |                           |
| Not at all                                          | 1.8 mg (40 g)            | 106 (20.3)             | 42 (23.0)               | 64 (18.9)                 |
| Once/twice per week                                 |                          | 134 (25.7)             | 40 (21.9)               | 94 (27.7)                 |
| Alternate day                                       |                          | 68 (13.0)              | 14 (7.7)                | 54 (15.9)                 |
| Daily                                               |                          | 214 (41.0)             | 87 (47.5)               | 127 (37.5)                |

|                                                               |                        |               |               |               |
|---------------------------------------------------------------|------------------------|---------------|---------------|---------------|
| <b>Intake of leafy vegetables (e.g. spinach) <sup>5</sup></b> |                        |               |               |               |
| Not at all                                                    |                        | 18 (3.5)      | 8 (4.4)       | 10 (3.0)      |
| Once/twice per week                                           | 6.4 g (180 g)          | 88 (16.9)     | 36 (19.7)     | 52 (15.3)     |
| Alternate day                                                 |                        | 109 (20.9)    | 38 (20.8)     | 71 (20.9)     |
| Daily                                                         |                        | 307 (58.8)    | 101 (55.2)    | 206 (60.8)    |
| <b>Intake of beans <sup>4</sup></b>                           |                        |               |               |               |
| Not at all                                                    |                        | 104 (19.9)    | 29 (15.9)     | 75 (22.1)     |
| Once/twice per week                                           | 4.6 – 8.8 mg (1 cup)   | 303 (58.1)    | 112 (61.2)    | 191 (56.3)    |
| Alternate day                                                 |                        | 93 (17.8)     | 32 (17.5)     | 61 (18.0)     |
| Daily                                                         |                        | 22 (4.2)      | 10 (5.5)      | 12 (3.5)      |
| <b>Intake of nuts <sup>3</sup></b>                            |                        |               |               |               |
| Not at all                                                    |                        | 200 (38.5)    | 70 (38.3)     | 130 (38.6)    |
| Once/twice per week                                           | 1.2 – 1.7 mg (1 oz)    | 259 (49.8)    | 91 (49.7)     | 168 (49.9)    |
| Alternate day                                                 |                        | 37 (7.1)      | 15 (8.2)      | 22 (6.5)      |
| Daily                                                         |                        | 24 (4.6)      | 7 (3.8)       | 17 (5.0)      |
| <b>Intake of dry fruits <sup>2</sup></b>                      |                        |               |               |               |
| Not at all                                                    |                        | 329 (63.0)    | 109 (59.6)    | 220 (64.9)    |
| Once/twice per week                                           | 1.3 – 1.7 mg (0.5 cup) | 168 (32.2)    | 68 (37.2)     | 100 (29.5)    |
| Alternate day                                                 |                        | 19 (3.6)      | 5 (2.7)       | 14 (4.1)      |
| Daily                                                         |                        | 6 (1.2)       | 1 (0.6)       | 5 (1.5)       |
| <b>Intake of eggs <sup>1</sup></b>                            |                        |               |               |               |
| Not at all                                                    |                        | 9 (1.7)       | 2 (1.1)       | 7 (2.1)       |
| Once/twice per week                                           | 0.9 mg (1 piece)       | 150 (28.8)    | 47 (25.8)     | 103 (30.4)    |
| Alternate day                                                 |                        | 234 (44.9)    | 82 (45.1)     | 152 (44.8)    |
| Daily                                                         |                        | 128 (24.6)    | 51 (28.0)     | 77 (22.7)     |
| <b>Dietary iron score* [mean SD]</b>                          |                        | 97.78 [16.10] | 99.00 [16.44] | 97.13 [15.90] |

# Estimated iron content in common foods taken by the Hong Kong population. This information is provided by the Department of Health, The Government of the Hong Kong Special Administrative Region. \* The dietary iron score is a composite of the type and frequency of food intake. Each type of food is ranked based on the estimated iron content per serving (shown in the Table). The rankings are presented as numerical subscripts (1 to 8), with a higher number indicative of higher iron content. For example, seafood has the highest iron content per serving (8 points) while egg has the lowest iron content per serving (1 point). The frequency of intake is graded from 1 to 4 points (1 point=Not at all, 2 points=Once/twice per week; 3 points=Alternate day; 4 points=Daily). The dietary iron score is tabulated by the formula: *(ranking of food 1)\*(the frequency of intake of food 1) + (ranking of food 2)\*(the frequency of intake of food 2) + ....* For example, if an adolescent reported taking seafood once/twice per week and beans on alternate days, he will be scored as  $(8*3) + (5*3) = 39$  points. The total computed score ranges from 36 points to 144 points.

**Supplementary Table S3.** Summary of Hematological Parameters.

|                              | Mean  | SD   | Median | IQR           |
|------------------------------|-------|------|--------|---------------|
| <b>All</b>                   |       |      |        |               |
| Hemoglobin (g/dl)            | 13.3  | 1.4  | 13.1   | 12.3 - 14.4   |
| WBC ( $\times 10^9/L$ )      | 6.9   | 1.5  | 6.9    | 5.9 - 7.9     |
| Platelet ( $\times 10^9/L$ ) | 259.2 | 59.5 | 255.0  | 216.0 - 293.5 |
| MCV (fl)                     | 86.2  | 6.6  | 87.4   | 84.7 - 89.8   |
| MCH (pg)                     | 28.5  | 4.4  | 28.9   | 27.9 - 29.8   |
| MCHC (g/dL)                  | 32.7  | 1.1  | 32.8   | 32.2 - 33.5   |
| HCT (L/L)                    | 0.4   | 0.03 | 0.40   | 0.37 - 0.43   |
| RDW (%)                      | 12.7  | 1.4  | 12.3   | 11.9 - 12.9   |
| Reticulocyte (%)             | 1.5   | 0.4  | 1.4    | 1.2 - 1.7     |
| Ferritin ( $\mu g/L$ )       | 94.6  | 86.7 | 69.9   | 33.0 - 124.2  |
| <b>Male Adolescents</b>      |       |      |        |               |
| Hemoglobin (g/dl)            | 14.7  | 0.8  | 14.7   | 14.2 - 15.2   |
| WBC ( $\times 10^9/L$ )      | 6.7   | 1.5  | 6.6    | 5.6 - 7.5     |
| Platelet ( $\times 10^9/L$ ) | 246.5 | 52.3 | 244    | 212 - 274     |
| MCV (fl)                     | 85.7  | 6.3  | 87.0   | 84.8 - 88.9   |
| MCH (pg)                     | 29.0  | 6.2  | 29.0   | 28.3 - 29.8   |
| MCHC (g/dL)                  | 33.1  | 0.9  | 33.3   | 32.6 - 33.8   |
| HCT (L/L)                    | 0.44  | 0.02 | 0.44   | 0.43 - 0.45   |
| RDW (%)                      | 12.5  | 1.4  | 12.2   | 11.8 - 12.6   |
| Reticulocyte (%)             | 1.5   | 0.4  | 1.4    | 1.1 - 1.7     |
| Ferritin ( $\mu g/L$ )       | 160.9 | 92.1 | 136.1  | 89.8 - 219.8  |
| <b>Female Adolescents</b>    |       |      |        |               |
| Hemoglobin (g/dl)            | 12.5  | 0.9  | 12.5   | 11.9 - 13.1   |
| WBC ( $\times 10^9/L$ )      | 7.0   | 1.4  | 7.0    | 6.0 - 7.9     |
| Platelet ( $\times 10^9/L$ ) | 266.0 | 62.0 | 266    | 219 - 305     |
| MCV (fl)                     | 86.4  | 6.8  | 88.1   | 84.6 - 90.3   |
| MCH (pg)                     | 28.1  | 2.9  | 28.8   | 27.4 - 29.8   |
| MCHC (g/dL)                  | 32.5  | 1.0  | 32.6   | 32.1 - 33.2   |
| HCT (L/L)                    | 0.38  | 0.02 | 0.38   | 0.36 - 0.40   |
| RDW (%)                      | 12.7  | 1.3  | 12.4   | 12.0 - 13.1   |
| Reticulocyte (%)             | 1.4   | 0.4  | 1.4    | 1.1 - 1.7     |
| Ferritin ( $\mu g/L$ )       | 58.9  | 58.1 | 44.9   | 20.9 - 74.5   |

HCT: hematocrit; MCH: mean corpuscular hemoglobin; MCHC: mean corpuscular hemoglobin concentration; MCV: mean corpuscular volume; RDW: red cell distribution width; WBC: white blood cell.

**Supplementary Table S4.** Quality of Life and Fatigue Measures.

|                        |                                       |
|------------------------|---------------------------------------|
| <b>Quality of Life</b> | <b>All (n = 523)</b>                  |
| <b>Physical *</b>      | 84.77 (12.33)                         |
| Emotion                | 67.78 (18.10)                         |
| Social                 | 82.92 (14.47)                         |
| School                 | 66.17 (18.91)                         |
| <b>Psychosocial *</b>  | 74.92 (13.03)                         |
| <b>Total *</b>         | 77.65 (11.95)                         |
| <b>Fatigue</b>         | <b>All (n = 522) * 1 missing data</b> |
| General                | 73.45 (17.09)                         |
| Sleep                  | 61.45 (15.16)                         |
| Cognitive              | 69.11 (18.87)                         |
| <b>Total #</b>         | 68.01 (13.87)                         |

A higher score is indicative of better functioning (ie. better quality of life and less fatigue). \* The "Psychosocial subscale" consists of the Emotion, Social and School subdomains. The "Total scale" consists of the Physical, Emotion, Social, and School subdomains. # The "Total fatigue scale" consists of the General, Sleep and Cognitive fatigue subdomains.
